# Supplementary material for: Differential effects of histone deacetylase inhibitors on cellular drug transporters and their implications for using epigenetic modifiers in combination chemotherapy
Source: PubMed Central journal article supplement (PMC5325407; doi:10.18632/oncotarget.11561), 2016-08-24
Supplement: oncotarget-07-63829-s001.pdf [file oncotarget-07-63829-s001.pdf]

## Differential effects of histone deacetylase inhibitors on cellular drug transporters and their implications for using epigenetic modifiers in combination chemotherapy

### SUPPLEMENTARY TABLES

Supplementary Table S1: Characteristics of patients whose cell samples were used in the study

| Patient | Age, yrs | Gender | Race               | Diagnosis                      |
|---------|----------|--------|--------------------|--------------------------------|
| L-02    | 61       | M      | African-American   | Peripheral T-cell lymphoma     |
| B-03    | 37       | M      | Caucasian          | T-cell prolymphocytic leukemia |
| 3       | 25       | F      | Unknown            | Anaplastic large cell lymphoma |
| 5       | 57       | F      | Hispanic or Latino | non-Hodgkin's lymphoma         |
| 7       | 41       | M      | African-American   | Hodgkin's lymphoma             |
| 8       | 38       | M      | Hispanic or Latino | Hodgkin's lymphoma             |
| 11      | 46       | M      | Unknown            | Hodgkin's lymphoma             |

**Supplementary Table S2: List of primary antibodies, their sources and dilutions**

| Antigen                                             | Source/Cat. #        | Clone type* | Dilution** |
|-----------------------------------------------------|----------------------|-------------|------------|
| AcH3K9                                              | Active Motif/39137   | pAb         | 2500       |
| BCRP                                                | Abcam/108312         | mAb         | 2500       |
| Cleaved Caspase 3                                   | Cell Signaling/9661  | pAb         | 2500       |
| HDAC1                                               | Cell Signaling/5356  | mAb         | 2500       |
| HDAC2                                               | Cell Signaling/5113  | mAb         | 3000       |
| HDAC3                                               | Cell Signaling/3949  | mAb         | 2500       |
| P-HDAC3 Ser424                                      | Cell Signaling/3815  | pAb         | 2000       |
| HDAC4                                               | Cell Signaling/5392  | mAb         | 2500       |
| P-HDAC4(Ser632)/<br>HDAC5(Ser661)/<br>HDAC7(Ser486) | Cell Signaling/3424  | pAb         | 2000       |
| HDAC5                                               | Cell Signaling/2082  | pAb         | 2500       |
| HDAC6                                               | Cell Signaling/7558  | mAb- R      | 2500       |
| HDAC7                                               | Cell Signaling/2882  | pAb         | 1500       |
| MDR1                                                | Abcam/170904         | mAb         | 2000       |
| MRP1                                                | Abcam/24102          | mAb         | 2000       |
| PARP1                                               | Santa Cruz/SC8007    | mAb         | 1000       |
| $\beta$ -ACTIN                                      | Sigma/A5316          | mAb         | 6000       |
| $\gamma$ -H2AX                                      | EMD Millipore/05-636 | mAb         | 3000       |
| 2MeH3K9                                             | Active Motif/39683   | mAb         | 2500       |
| 3MeH3K9                                             | Active Motif/39161   | pAb         | 3500       |

\* pAb: polyclonal antibody; used anti-rabbit IgG for secondary antibody from Bio-Rad Lab mAb: monoclonal antibody; used anti-mouse IgG (or anti-rabbit IgG as indicated - R) for secondary antibody from Bio-Rad Lab

\*\*Fold dilution in PBS with 0.05% Tween 20

Supplementary Table S3: Primers for real-time PCR analysis

| Gene         | Forward                                | Reverse                                | Annealing Temp (°C) |
|--------------|----------------------------------------|----------------------------------------|---------------------|
| <i>GAPDH</i> | 5'-CAACAGCCTCAAGATCATCAGC-3'           | 5'-TCCTAGACGGCAGGTCAGGTC-3'            | 60                  |
| <i>MRP1</i>  | 5'-CGGAAACCATCCACGACCCTAATC-3'         | 5'-ACCTCCTCATTCGCATCCACCTTGG-3'        | 60                  |
| <i>MDR1</i>  | 5'-GCCTGGCAGCTGGAAGACAAATACACAAAATT-3' | 5'-CAGACAGCAGCTGACAGTCCAAGAACAGGACT-3' | 60                  |
